# Supplementary material for: Polygonatum sibiricum Polysaccharides Protect against MPP‐Induced Neurotoxicity via the Akt/mTOR and Nrf2 Pathways
Source: Hindawi journal article supplement (doi:10.1155/2021/8843899), 2021-01-01

**Figure S1**

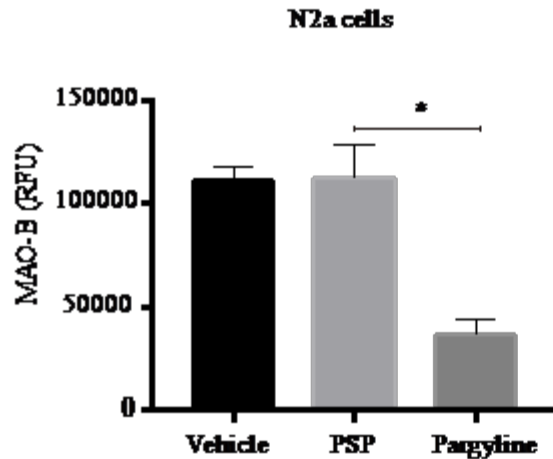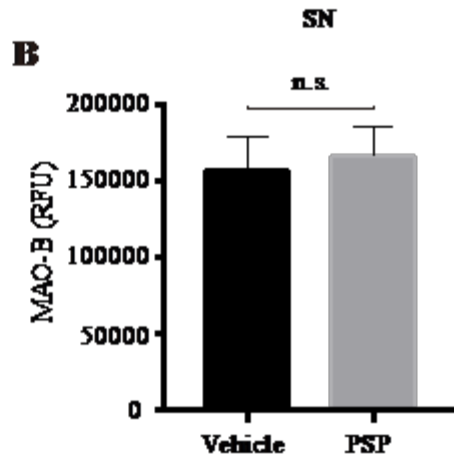

Supplement: f1 [file 8843899.f1.pdf]
